# Supplementary material for: Peer support for frequent users of inpatient mental health care in Uganda: protocol of a quasi-experimental study
Source: Springer Nature journal article supplement (doi:10.1186/s12888-019-2360-8), 2019-11-29
Supplement: MOESM1 [file 17451398]

## Additional File 1: Brain Gain II Theory of Change Map

### Theory of Change for Brain Gain II

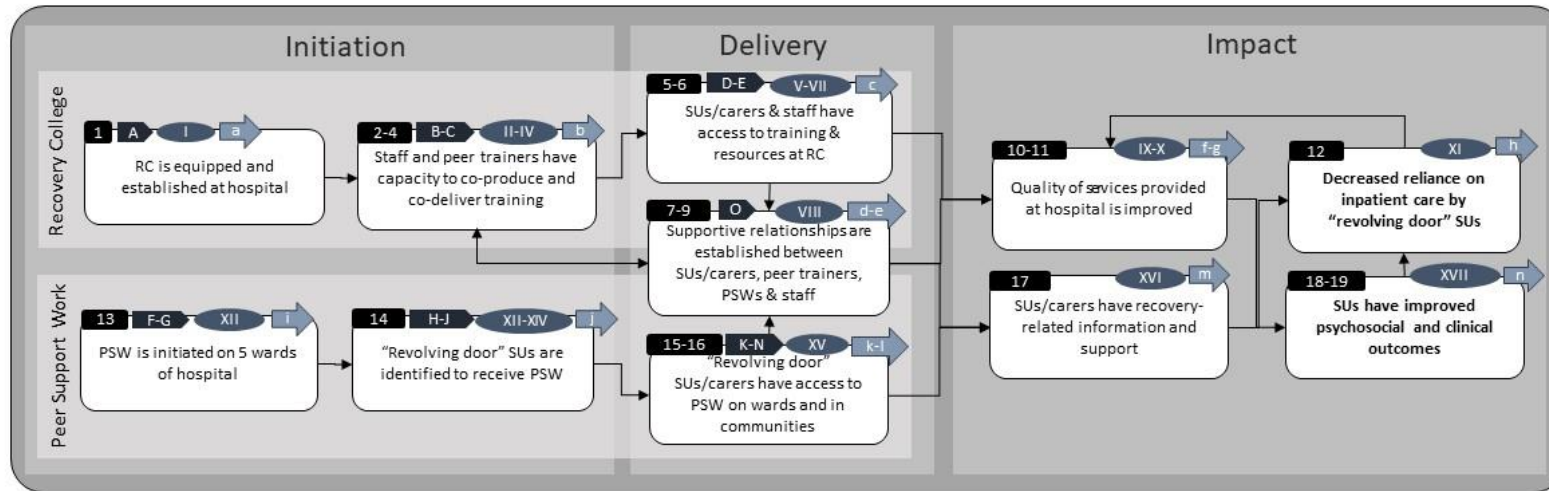

#### INDICATORS

- Building refurbishment completed by target date
- Number of attendees completing TOTs, disaggregated by attendee type
- Proportion of attendees able to develop and execute a lesson plan during TOT demonstration
- Mean improvement in peer assessment score between first and second TOT
- Average number of RC trainings held per month after opening
- Average RC training attendance, disaggregated by attendee type
- Qualitative data collected from SUs, peer trainers and staff
- Difference in family support scores at 6 month follow-up
- Qualitative data collected from SUs, PSWs, staff and hospital administrators
- Change in knowledge, attitudes and practices of hospital staff
- Difference in patient satisfaction score
- Change in number of inpatient days at 6 month follow-up
- Proportion of identified wards accepting initial PSW visits
- Average number of appropriate referrals to PSW per month, disaggregated by ward
- Proportion of appropriate referrals receiving at least 1 ward and 3 community PSW visits
- Average number of contacts with a PSW, disaggregated by contacts with SU alone, carer(s) alone, or SU and carers together
- Perceptions of SUs and PSWs as discussed in focus groups
- Difference in WHODAS 12-item disability score
- Self-reported change in psychosocial circumstances, disaggregated by change in employment, education, relationships

## ➔ RATIONALES

- a. Location at hospital ensures accessibility and decreases stigmatization of Butabika
- b. Co-production and co-delivery increase social contact between staff and peer trainers and role-model principles of equality to trainees, reducing stigma and building relationships
- c. Creating a space for staff, SUs and carers to use increases social contact, reducing stigma and building relationships
- d. Having relationships with SUs, peer trainers and PSWs encourages staff and carers to treat SUs as equals
- e. PSWs add to SUs and carers social support network in the community
- f. Quality services will better prepare SUs to manage in the community, decreasing likelihood of readmission
- g. Quality services will improve outcomes of SUs leaving hospital
- h. High patient load negatively impacts quality of care
- i. Adult admissions wards are included except for drug and alcohol unit, as PSWs have not yet been trained to address addiction
- j. "Revolving door" SUs are more likely to have issues managing their illness in the community, which PSWs aim to support
- k. Having PSWs on wards increases social contact with staff, allows PSWs to help problem-solve when issues with inpatient care arise, and allows PSWs provide transitional support back to community at a point when SUs are particularly vulnerable
- l. Having PSW in community helps to bolster social support network and problem-solve in the community, partially through interaction with carer
- m. Adopting a recovery-oriented approach to care encourages illness management in the community and may improve outcomes
- n. If outcomes are better, SUs will not require as much inpatient care

## ● ASSUMPTIONS

- I. Hospital staff and administration are willing and able to make a facility available for RC
- II. Trainers are willing and able to collaborate
- III. Trainers are willing and able to attend TOTs
- IV. TOTs build sufficient capacity
- V. Trainers are willing and able to produce and deliver regular trainings
- VI. SUs, carers and staff are willing and able to attend RC without compensation
- VII. Programme has sufficient human and material resources to keep RC open regularly for project duration
- VIII. Interventions delivered through RC and PSW are sufficient to change relationships
- IX. Interventions delivered and supportive relationships built through RC and PSW are capable of changing the quality of services
- X. Reduction in client load from "revolving door" SUs is sufficient to enable hospital staff to take on quality improvement measures
- XI. Better outcomes and access to quality services, information and support are sufficient to change illness management behavior
- XII. PSWs from Brain Gain I are willing and able to deliver service on wards
- XIII. Hospital staff and administration are willing to have PSWs on the wards
- XIV. Ward staff are willing and able to identify and refer "revolving door" SUs
- XV. PSWs, SUs and carers are willing and able to complete full course of visits
- XVI. RC and PSW interventions are sufficient to equip SUs and carers
- XVII. Information, support and quality services are sufficient to improve outcomes

## ➔ INTERVENTIONS

- A. Purchase equipment (furniture, computers, books, teaching supplies) and refurbish community building
- B. Recruit staff from wards and peer trainers from existing PSWs and former peers from Brain Gain I
- C. Conduct two TOTs for staff and peer trainers to attend collaboratively
- D. Develop educational films on recovery and common questions about MNS disorders, as resources for RC
- E. Conduct bi-monthly, co-produced and co-delivered trainings on recovery-related topics for a variety of attendee types
- F. Recruit Brain Gain II PSWs from existing PSWs trained in Brain Gain I
- G. Initiate mutual support groups for supervision
- H. Conduct trainings of trainers for ward in-charges to learn to use referral forms
- I. Ward in-charges train and supervise ward staff to make referrals
- J. Monitoring and Evaluation Officer works with hospital staff to confirm "revolving door" status by examining patient records
- K. PSWs are assigned correctly referred SUs in their respective catchment areas
- L. PSWs conduct a minimum of 1 ward visit and 3 community visits to each assigned SU, interfacing with carers and ward staff as needed
- M. During visits, PSWs role-model, educate on principles of recovery, aid in problem-solving, and/or offer encouragement, as needed
- N. Ongoing monitoring and evaluation is carried out to confirm that SUs are receiving visits as intended
- O. Staff accompany PSWs on visits for specialist assistance on an as-needed basis
